# Supplementary material
Source: PubMed Central journal article supplement (PMC2551328)
Supplement: NIHMS59354-supplement-supplementary.pdf [file NIHMS59354-supplement-supplementary.pdf]

Oligonucleotide sequences used for PCR mutagenesis:

Y461A, D463A, and N481A

Primer A 5'-CAG GGG AAT TCG TGC CCG ACG CGG TC

Primer B 5'-CGA GTG CGG CCG CAA GCT TTC ACG ACA GAT C

Y461A

Primer C 5'-CCA CGC CGT CGA CCG GCC GGG AGC GC

Primer D 5'-GTC GAC GGC GTG GAT GAT CAG GTT G

D463A

Primer C 5'-GTC GCC CGG CCG GGA GCG CTG GGC AAG

Primer D 5'-CGG CCG GGC GAC GTA GTG GAT GAT CAG

N481A

Primer C 5'-GGG TGG CTA TCC AGG CCG CGC AGC TC

Primer D 5'-CTG GAT AGC CAC CCC GGC CGT CC

G316V, G317V, G318V, G316-317V, G317-318V, G316-318V, G316-317-318V

Primer F 5'- CGA GTG CGG CCG CAA GCT TTC ACG ACA GAT C

G316V

Primer E 5'-GGG GAA TTC GTG CCC GAC GCG GTC AAC GTC GTC GGC GGA  
GTG GTC AAC

G317V

Primer E 5'-GGG GAA TTC GTG CCC GAC GCG GTC AAC GTC GGC GTC GGA  
GTG GTC AAC

G318V

Primer E 5'- GGG GAA TTC GTG CCC GAC GCG GTC AAC GTC GGC GGC GTA  
GTG GTC AAC GAG G

G316-317V

Primer E 5'-CAG GGG AAT TCG TGC CCG ACG CGG TCA ACG TCG TCG TCG  
GAG TGG TCA ACG AGG

G317-318V

Primer E 5'-CAG GGG AAT TCG TGC CCG ACG CGG TCA ACG TCG GCG TCG  
TAG TGG TCA ACG AGG

G316-318V

Primer E 5'-CAG GGG AAT TCG TGC CCG ACG CGG TCA ACG TCG TCG GCG  
TAG TGG TCA ACG AGG

G316-317-318V

Primer E 5'-CAG GGG AAT TCG TGC CCG ACG CGG TCA ACG TCG TCG TCG  
TAG TGG TCA ACG AGG
